# Supplementary material for: Detection of Filoviruses in Bats in Vietnam
Source: MDPI journal article supplement (doi:10.3390/v15091785), 2023-08-23
Supplement: s1 [file s1]

Table S1. Primer sequences and conditions for PCR assays.

| Primers                                                             | Stage                              | 5'-3' primer sequence                                  | PCR conditions                                                                                                                                                                                                                                                                                            |
|---------------------------------------------------------------------|------------------------------------|--------------------------------------------------------|-----------------------------------------------------------------------------------------------------------------------------------------------------------------------------------------------------------------------------------------------------------------------------------------------------------|
| Nested PCR assay for screening of filoviruses , He B. et al [18]    |                                    |                                                        |                                                                                                                                                                                                                                                                                                           |
| FV-F1<br>FV-R1                                                      | 1st<br>round of<br>PCR             | GCMTTYCCIAGYAAAYATGATGG<br>GTDATRCAYTGRTRTCHCCCAT      | 95°C for 5 min<br>95°C for 30 s<br>54°C for 30 s<br>72°C for 40 s<br>72°C for 5 min<br>35 cycles                                                                                                                                                                                                          |
| FV-F2<br>FV-R2                                                      | 2nd<br>round of<br>PCR<br>(351 bp) | TDCAYCARGCITCDTGGCAYC<br>GIGCACGADATRWIGTCC            | 95°C for 5 min<br>95°C for 30 s<br>54°C for 30 s<br>72°C for 40 s<br>72°C for 5 min<br>30 cycles                                                                                                                                                                                                          |
| Nested PCR for screening of filoviruses, Goldstein T. et al [15]    |                                    |                                                        |                                                                                                                                                                                                                                                                                                           |
| Filo-Mod-FWD<br>Filo L. conR                                        | 1st<br>round of<br>PCR             | TITTYTCHVTICAAAAICAYTGGG<br>ACCATCATRTRTCTIGGRAAKGCTTT | 95°C for 5 min<br>95°C for 15 s<br>55°C for 60 s<br>72°C for 60 s<br>72°C for 5 min<br>40 cycles                                                                                                                                                                                                          |
| Filo-Mod-FWD<br>Filo-Mod-RVS                                        | 2nd<br>round of<br>PCR<br>(680 bp) | TITTYTCHVTICAAAAICAYTGGG<br>GCYTCISMIAIIGTTTGIACATT    | 95°C for 5 min<br>95°C for 15 s<br>58°C for 60 s<br>72°C for 60 s<br>3 cycles<br><br>95°C for 15 s<br>55°C for 60 s<br>72°C for 60 s<br>3 cycles<br><br>95°C for 15 s<br>53°C for 60 s<br>72°C for 60 s<br>3 cycles<br><br>95°C for 15 s<br>50°C for 60 s<br>72°C for 60 s<br>72°C for 5 min<br>20 cycles |
| PCR for screening MARV and MARV-like viruses, Aiginin A. et al [25] |                                    |                                                        |                                                                                                                                                                                                                                                                                                           |
| Marburg F V2<br>Marburg R V2<br>(398 bp)                            |                                    | CVTATCGTGTGCAGAAATGTCCA<br>ATTDGCACAATCAGGTGGGT        | 95°C for 5 min<br>95°C for 15 s<br>58°C for 60 s<br>72°C for 60 s<br>3 cycles<br><br>95°C for 15 s<br>55°C for 60 s<br>72°C for 60 s<br>3 cycles<br><br>95°C for 15 s<br>53°C for 60 s<br>72°C for 60 s<br>3 cycles<br><br>95°C for 15 s<br>50°C for 60 s<br>72°C for 60 s<br>72°C for 5 min<br>33 cycles |
